# Supplementary material
Source: PubMed Central journal article supplement (PMC10363194)
Supplement: NIHMS1877817-supplement-2.pdf [file NIHMS1877817-supplement-2.pdf]

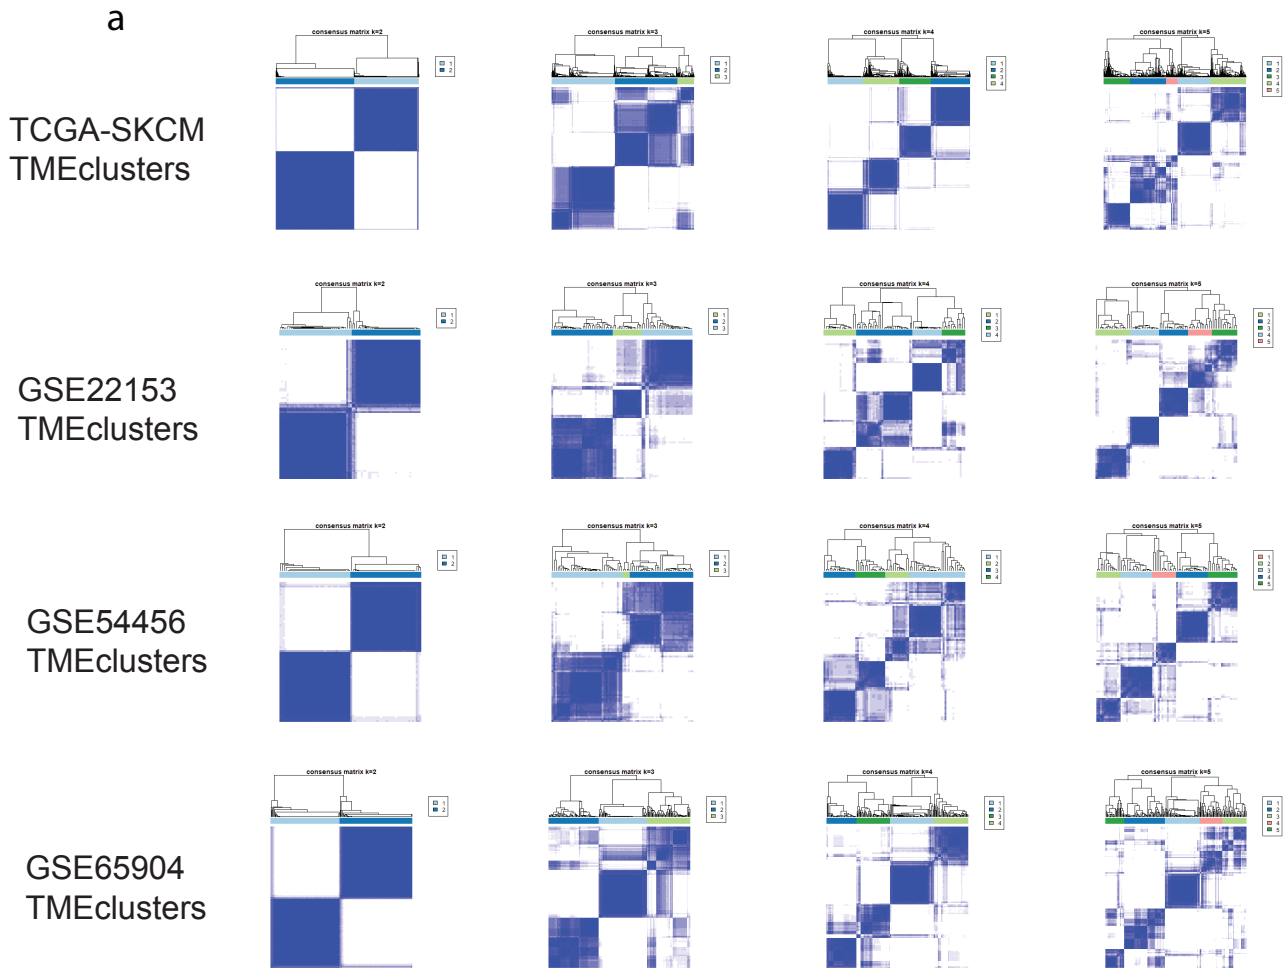

**Figure S2: Consensus matrices of validation cohorts**

**(a)** Consensus matrices based on tumor microenvironment infiltrating immune cells of TCGA-SKCM, GSE22153, GSE54456, and GSE65904 cohort that include all samples for each  $k$  ( $k = 2-5$ ). Shown is the clustering stability by using 1000 event iterations of hierarchical clustering.
