# Supplementary material
Source: PubMed Central journal article supplement (PMC10363194)
Supplement: NIHMS1877817-supplement-4.pdf [file NIHMS1877817-supplement-4.pdf]

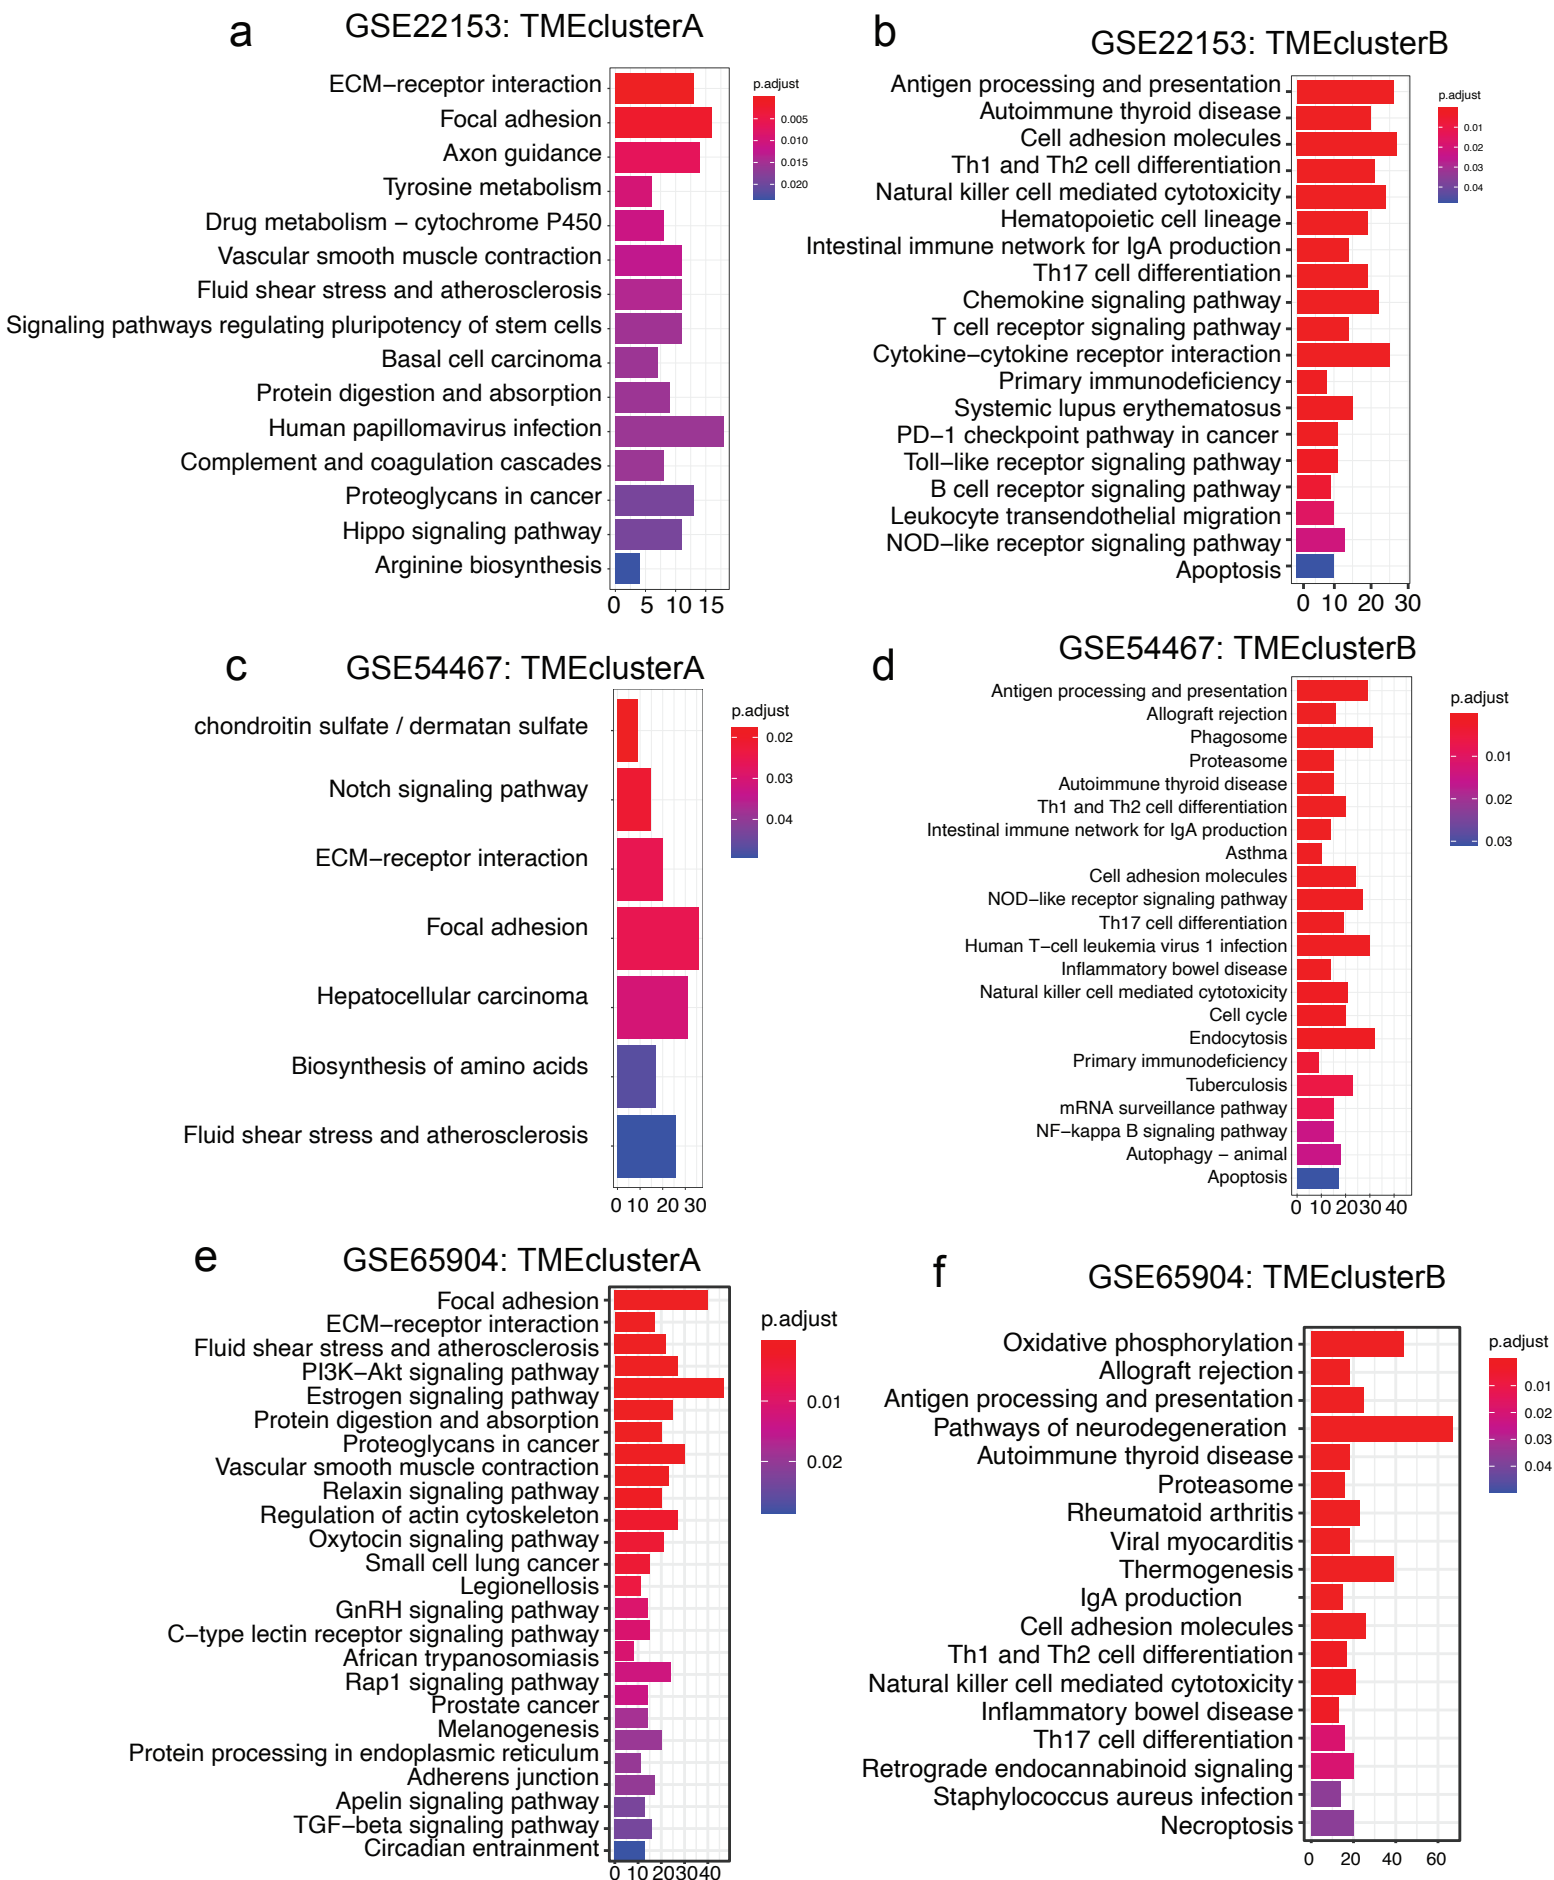

**Figure S4: Transcriptome traits in distinct TME clusters of validation cohorts**

(a-b) Kyoto Encyclopedia of Genes and Genomes (KEGG) analysis of differentially expressed genes (DEGs) presented a higher carcinogenic pathway in TMEclusterA (a) and higher immune cell activation in TMEclusterB (b) in GSE22153. (c-d) KEGG analysis of differentially expressed genes (DEGs) presented a higher carcinogenic pathway in TMEclusterA (c) and higher immune cell activation in TMEclusterB (d) in GSE54467. (e-f) KEGG analysis of differentially expressed genes (DEGs) presented a higher carcinogenic pathway in TMEclusterA (e) and higher immune cell activation in TMEclusterB (f) in GSE65904.
